# Supplementary material
Source: ML conference proceedings conference paper supplement (https://proceedings.mlr.press/v80/zhu18a.html)
Supplement: Supplementary file [file zhu18a-supp.pdf]

---

## Supplementary Material

### Distributed Nonparametric Regression under Communication Constraints

---

#### A. Proof of lemmas

##### A.1. Proof of Lemma 3.1

. Write

$$\Theta_\ell(\alpha, c) = \left\{ \theta : \sum_{i=1}^{\ell} i^{2\alpha} \theta_i^2 \leq c^2, \theta_i = 0 \text{ for } i \geq \ell + 1 \right\} \subset \Theta(\alpha, c).$$

For  $\tau \in (0, 1)$ , write  $s_i^2 = (1 - \tau)\sigma_i^2$ , and denote by  $\pi_\tau(\theta)$  the prior distribution on  $\theta$  such that  $\theta_i \sim N(0, s_i^2)$  for  $i = 1, \dots, \ell$ , and  $\mathbb{P}(\theta_i = 0) = 1$  for  $i \geq \ell + 1$ . For an estimator  $\hat{\theta}$  and its corresponding communication protocol, we observe that

$$\begin{aligned} \sup_{\theta \in \Theta(\alpha, c)} \|\hat{\theta} - \theta\|^2 &\geq \sup_{\theta \in \Theta_\ell(\alpha, c)} \|\hat{\theta} - \theta\|^2 \\ &\geq \int_{\Theta_\ell(\alpha, c)} \|\hat{\theta} - \theta\|^2 d\pi_\tau(\theta) \\ &\geq I_\tau - r_\tau \end{aligned}$$

where  $I_\tau$  is the integrated risk of the estimator

$$I_\tau = \int_{\mathbb{R}^\ell \otimes \{0\}^\infty} \|\hat{\theta} - \theta\|^2 d\pi_\tau(\theta)$$

and  $r_\tau$  is the residual

$$r_\tau = \int_{\Theta(\alpha, c)} \|\hat{\theta} - \theta\|^2 d\pi_\tau(\theta)$$

where  $\overline{\Theta(\alpha, c)} = (\mathbb{R}^\ell \otimes \{0\}^\infty) \setminus \Theta_\ell(\alpha, c)$ . As  $\lim_{\tau \rightarrow 0} I_\tau = \int_{\Theta} \mathbb{E}_\theta[\|\hat{\theta} - \theta\|^2] d\pi(\theta)$ , it suffices to show that  $r_\tau = o(I_\tau)$  as  $\ell \rightarrow \infty$  for  $\tau \in (0, 1)$ . Let  $B_\ell = \sup_{\theta \in \Theta_\ell(\alpha, c)} \|\theta\|$ , which is bounded since for any  $\theta \in \Theta_\ell(\alpha, c)$

$$\|\theta\| = \sqrt{\sum_{i=1}^{\ell} \theta_i^2} = \sqrt{\sum_{i=1}^{\ell} i^{2\alpha} \theta_i^2} \leq \sqrt{c^2} = c.$$

We have

$$\begin{aligned} r_\tau &= \int_{\Theta_\ell(\alpha, c)} \mathbb{E}_\theta \left[ \|\hat{\theta} - \theta\|^2 \right] d\pi_\tau(\theta) \\ &\leq 2 \int_{\Theta_\ell(\alpha, c)} (B_\ell^2 + \|\theta\|^2) d\pi_\tau(\theta) \\ &\leq 2 \left( B_\ell^2 \mathbb{P}(\theta \notin \Theta_\ell(\alpha, c)) + \frac{1}{10} (\mathbb{P}(\theta \notin \Theta_\ell(\alpha, c)) \mathbb{E}[\|\theta\|^4]) \right) \end{aligned}$$

where we have used the Cauchy-Schwarz inequality. Noticing that

$$\begin{aligned}
 \mathbb{E} [\|\theta\|^4] &= \mathbb{E} \left[ \left( \sum_{i=1}^{\ell} \theta_i^2 \right)^2 \right] \\
 &= \sum_{i_1 \neq i_2} \mathbb{E} [\theta_{i_1}^2] \mathbb{E} [\theta_{i_2}^2] + \sum_{i=1}^{\ell} \mathbb{E} [\theta_i^4] \\
 &\leq \sum_{i_1 \neq i_2} s_{i_1}^2 s_{i_2}^2 + 3 \sum_{i=1}^{\ell} s_i^4 \\
 &\leq 3 \left( \sum_{i=1}^{\ell} s_i^2 \right)^2 \leq 3B_{\ell}^4,
 \end{aligned}$$

we obtain

$$r_{\tau} \leq 2B_{\ell}^2 \left( \mathbb{P}(\theta \notin \Theta_{\ell}(\alpha, c)) + \sqrt{3\mathbb{P}(\theta \notin \Theta_{\ell}(\alpha, c))} \right) \leq 6B_{\ell}^2 \sqrt{3\mathbb{P}(\theta \notin \Theta_{\ell}(\alpha, c))}.$$

Thus, we only need to show that  $\sqrt{\mathbb{P}(\theta \notin \Theta_{\ell}(\alpha, c))} = o(I_{\tau})$ . In fact,

$$\begin{aligned}
 \mathbb{P}(\theta \notin \Theta_{\ell}(\alpha, c)) &= \mathbb{P} \left( \sum_{i=1}^{\ell} i^{2\alpha} \theta_i^2 > c^2 \right) \\
 &= \mathbb{P} \left( \sum_{i=1}^{\ell} i^{2\alpha} (\theta_i^2 - \mathbb{E}[\theta_i^2]) > c^2 - (1-\tau) \sum_{i=1}^{\ell} i^{2\alpha} \sigma_i^2 \right) \\
 &= \mathbb{P} \left( \sum_{i=1}^{\ell} i^{2\alpha} (\theta_i^2 - \mathbb{E}[\theta_i^2]) > \tau c^2 \right) \\
 &= \mathbb{P} \left( \sum_{i=1}^{\ell} i^{2\alpha} s_i^2 (Z_i^2 - 1) > \frac{\tau}{1-\tau} \sum_{i=1}^{\ell} i^{2\alpha} s_i^2 \right)
 \end{aligned}$$

where  $Z_i \sim N(0, 1)$ . By Lemma A.1, we get

$$\mathbb{P}(\theta \notin \Theta_{\ell}(m, c)) \leq \exp \left( -\frac{\tau^2}{8(1-\tau)^2} \frac{\sum_{i=1}^{\ell} i^{2\alpha} s_i^2}{\max_{1 \leq i \leq \ell} i^{2\alpha} s_i^2} \right) = \exp \left( -\frac{\tau^2}{8(1-\tau)^2} \frac{\sum_{i=1}^{\ell} i^{2\alpha} \sigma_i^2}{\max_{1 \leq i \leq \ell} i^{2\alpha} \sigma_i^2} \right).$$

By the assumption that  $\frac{\sum_{i=1}^{\ell} i^{2\alpha} \sigma_i^2}{\max_{1 \leq i \leq \ell} i^{2\alpha} \sigma_i^2} = O(\ell)$ , and that  $\int_{\Theta} \mathbb{E}_{\theta} [\|\hat{\theta} - \theta\|^2] d\pi(\theta) = O(\ell^{\delta})$ , we conclude that  $r_{\tau} = o(I_{\tau})$  as  $\ell \rightarrow \infty$ .  $\square$

**Lemma A.1** (Lemma 3.5 in (Tsybakov, 2008)). *Suppose that  $Z_1, \dots, Z_n \sim N(0, 1)$  independently. For  $t \in (0, 1)$  and  $\omega_i > 0, i = 1, \dots, n$ , we have*

$$\mathbb{P} \left( \sum_{i=1}^n \omega_i (Z_i^2 - 1) > t \sum_{i=1}^n \omega_i \right) \leq \exp \left( -\frac{t^2 \sum_{i=1}^n \omega_i}{8 \max_{1 \leq i \leq n} \omega_i} \right).$$

## A.2. Proof of Lemma 3.2

. Recall that we have  $\theta_i \sim N(0, \sigma_i^2)$  and  $X_{ij} | \theta_i \sim N(\theta_i, \varepsilon^2)$  for  $i = 1, \dots, \ell$ , and  $j = 1, \dots, m$ . For convenience, write  $\theta = (\theta_1, \dots, \theta_{\ell})$ ,  $X_j = (X_{1j}, \dots, X_{\ell j})$  and  $X = (X_1, \dots, X_m)$ . Suppose that we have a set of encoding functions  $\Pi_j : \mathbb{R}^{\ell} \rightarrow \{1, \dots, M_j\}$  for  $j = 1, \dots, m$  satisfying that  $\sum_{j=1}^m \log M_j \leq mb$ . Let  $W_j = \Pi_j(X_j)$  be the message generated from the  $j$ th machine, and write  $W = (W_1, \dots, W_m)$ . Furthermore, we write  $d_i = \mathbb{E}(\theta_i - \mathbb{E}(\theta_i | W))^2$  and

$d_{ij} = \mathbb{E}(X_{ij}|\theta, W_j)^2$ . We then have

$$\begin{aligned}
 \sum_{j=1}^m \log M_j &\geq H(W) \\
 &\geq I(\theta, X; W) \\
 &= I(\theta; W) + \sum_{j=1}^m I(X_j; W_j|\theta) \\
 &= h(\theta) - h(\theta|W) + \sum_{j=1}^m (h(X_j|\theta) - h(X_j|\theta, W)) \\
 &= \sum_{i=1}^{\ell} h(\theta_i) - \sum_{i=1}^{\ell} h(\theta_i|\theta_{1:(i-1)}, W) + \sum_{j=1}^m \left( \sum_{i=1}^{\ell} h(X_{ij}|\theta) - \sum_{i=1}^{\ell} h(X_{ij}|X_{1:(i-1),j}, \theta, W_j) \right) \\
 &\geq \sum_{i=1}^{\ell} h(\theta_i) - \sum_{i=1}^{\ell} h(\theta_i|W) + \sum_{j=1}^m \left( \sum_{i=1}^{\ell} h(X_{ij}|\theta) - \sum_{i=1}^{\ell} h(X_{ij}|\theta, W_j) \right) \\
 &\geq \sum_{i=1}^{\ell} \left( \frac{1}{2} \log \frac{\sigma_i^2}{d_i} + \sum_{j=1}^m \frac{1}{2} \log \frac{\varepsilon^2}{d_{ij}} \right). \tag{A.1}
 \end{aligned}$$

In order to obtain the relationship between  $d_i$ 's and  $d_{ij}$ 's, we consider the random vector  $Y = \mathbb{E}(\theta|X)$ , i.e.,  $Y_i = \mathbb{E}(\theta_i|X)$  for  $i = 1, \dots, n$ . In fact,  $Y_i$  takes the form

$$Y_i = \frac{\frac{1}{\varepsilon^2}}{\frac{1}{\sigma_i^2} + \frac{m}{\varepsilon^2}} \sum_{j=1}^m X_{ij}.$$

We first calculate the optimal mean squared error of estimating  $Y_i$  based on  $\theta$  and  $W$

$$\mathbb{E} [(Y_i - \mathbb{E}(Y_i|\theta, W))^2] = \left( \frac{\frac{1}{\varepsilon^2}}{\frac{1}{\sigma_i^2} + \frac{m}{\varepsilon^2}} \right)^2 \mathbb{E} \left[ \left( \sum_{j=1}^m (X_{ij} - \mathbb{E}[X_{ij}|\theta, W_j]) \right)^2 \right] = \left( \frac{\frac{1}{\varepsilon^2}}{\frac{1}{\sigma_i^2} + \frac{m}{\varepsilon^2}} \right)^2 \sum_{j=1}^m d_{ij}$$

where we have used the equality that

$$\begin{aligned}
 &\mathbb{E} [(X_{ij} - \mathbb{E}[X_{ij}|\theta, W_j])(X_{ij'} - \mathbb{E}[X_{ij'}|\theta, W_{j'}])] \\
 &= \mathbb{E} [X_{ij} - \mathbb{E}[X_{ij}|\theta, X_{ij'}, W_j, W_{j'}]] \mathbb{E} [X_{ij'} - \mathbb{E}[X_{ij'}|\theta, W_{j'}]] = 0
 \end{aligned}$$

for  $j \neq j'$ .

We then calculate the mean squared error of best linear estimator of  $Y_i$  using  $\theta_i$  and  $T_i = \mathbb{E}(\theta_i|W)$ . In particular, we search for  $\beta_1$  and  $\beta_2$  such that

$$\mathbb{E} [(Y_i - \beta_1\theta_i - \beta_2T_i)^2]$$

is minimized. Towards that end, we calculate

$$\mathbb{E} [Y_i^2] = \left( \frac{\frac{1}{\varepsilon^2}}{\frac{1}{\sigma_i^2} + \frac{m}{\varepsilon^2}} \right)^2 \mathbb{E} \left[ \left( \sum_{j=1}^m X_{ij} \right)^2 \right] = \left( \frac{\frac{1}{\varepsilon^2}}{\frac{1}{\sigma_i^2} + \frac{m}{\varepsilon^2}} \right)^2 (m^2\varepsilon^2 + m\sigma_i^2) = \frac{\frac{m}{\varepsilon^2}}{\frac{1}{\sigma_i^2} + \frac{m}{\varepsilon^2}} \sigma_i^2 = \sigma_i^2 - \sigma_0^2$$

where we write  $\sigma_0^2 = \frac{1}{\frac{1}{\sigma_i^2} + \frac{m}{\varepsilon^2}}$  to ease our notation. In addition, we have

$$\mathbb{E} [\theta_i^2] = \sigma_i^2 \text{ and } \mathbb{E} [Y_i\theta_i] = \frac{\frac{1}{\varepsilon^2}}{\frac{1}{\sigma_i^2} + \frac{m}{\varepsilon^2}} \mathbb{E} \left[ \sum_{j=1}^m \theta_i X_{ij} \right] = \sigma_i^2 - \sigma_0^2.$$

Furthermore, we notice that since  $T_i = \mathbb{E}[\theta_i|W]$ ,

$$\mathbb{E}[T_i(\theta_i - T_i)] = \mathbb{E}[\mathbb{E}[T_i(\theta_i - T_i) | W]] = \mathbb{E}[T_i] \mathbb{E}[\theta_i - T_i] = 0,$$

and hence

$$d_i = \mathbb{E}[(\theta_i - T_i)^2] = \mathbb{E}[\theta_i(\theta_i - T_i) - T_i(\theta_i - T_i)] = \mathbb{E}[\theta_i(\theta_i - T_i)] = \mathbb{E}[\theta_i^2] - \mathbb{E}[\theta_i T_i],$$

from which we obtain

$$\mathbb{E}[T_i^2] = \mathbb{E}[\theta_i T_i] = \sigma_i^2 - d_i.$$

Finally, we have

$$\mathbb{E}[Y_i T_i] = \mathbb{E}[(\theta_i + (Y_i - \theta_i))T_i] = \mathbb{E}[\theta_i T_i] + \mathbb{E}[Y_i - \theta_i] \mathbb{E}[T_i] = \mathbb{E}[\theta_i T_i] = \sigma_i^2 - d_i$$

where the equality follows from the fact that  $\theta_i$  and  $\theta_i - Y_i$  are independent. To sum up, the covariance matrix of  $(Y_i, \theta_i, T_i)$  is

$$\begin{pmatrix} \sigma_i^2 - \sigma_0^2 & \sigma_i^2 - \sigma_0^2 & \sigma_i^2 - d_i \\ \sigma_i^2 - \sigma_0^2 & \sigma_i^2 & \sigma_i^2 - d_i \\ \sigma_i^2 - d_i & \sigma_i^2 - d_i & \sigma_i^2 - d_i \end{pmatrix}.$$

Getting back to  $\beta_1$  and  $\beta_2$ , they should satisfy

$$\mathbb{E}[\theta_i(Y_i - \beta_1 \theta_i - \beta_2 T_i)] = 0, \quad \mathbb{E}[T_i(Y_i - \beta_1 \theta_i - \beta_2 T_i)] = 0.$$

Solving the equations, we get

$$\beta_1 = \frac{d_i - \sigma_0^2}{d_i}, \quad \beta_2 = \frac{\sigma_0^2}{d_i},$$

and

$$\mathbb{E}[(Y_i - \beta_1 \theta_i - \beta_2 T_i)^2] = \sigma_0^2 - \frac{\sigma_0^4}{d_i}.$$

Since conditional means minimize mean squared errors, we have

$$\mathbb{E}[(Y_i - \mathbb{E}(Y_i|\theta, W))^2] \leq \mathbb{E}[(Y_i - \beta_1 \theta_i - \beta_2 T_i)^2]$$

and therefore,

$$\left(\frac{1}{\sigma_i^2} + \frac{m}{\varepsilon^2}\right)^2 \sum_{j=1}^m d_{ij} \leq \frac{1}{\sigma_i^2} + \frac{m}{\varepsilon^2} - \left(\frac{1}{\sigma_i^2} + \frac{m}{\varepsilon^2}\right)^2 \frac{1}{d_i},$$

which gives

$$\sum_{j=1}^m d_{ij} \leq \varepsilon^4 \left(\frac{1}{\sigma_i^2} + \frac{m}{\varepsilon^2} - \frac{1}{d_i}\right).$$

Now we plug this into (A.1), and obtain by applying Jensen's inequality that

$$\begin{aligned} mb &\geq \sum_{i=1}^{\ell} \left( \frac{1}{2} \log \frac{\sigma_i^2}{d_i} + \sum_{j=1}^m \frac{1}{2} \log \frac{\varepsilon^2}{d_{ij}} \right) \\ &\geq \sum_{i=1}^{\ell} \left( \frac{1}{2} \log \frac{\sigma_i^2}{d_i} + \frac{m}{2} \log \frac{\varepsilon^2}{\frac{1}{m} \sum_{j=1}^m d_{ij}} \right) \\ &\geq \sum_{i=1}^{\ell} \left( \frac{1}{2} \log \frac{\sigma_i^2}{d_i} + \frac{m}{2} \log \frac{\frac{m}{\varepsilon^2}}{\frac{1}{\sigma_i^2} + \frac{m}{\varepsilon^2} - \frac{1}{d_i}} \right), \end{aligned}$$

which completes the proof.  $\square$
